# Supplementary material
Source: Springer Nature journal article supplement (https://www.springermedizin.de/resource/supplementary/12885_2009_1760_MOESM5_ESM.pdf/9472864)

# Overall survival

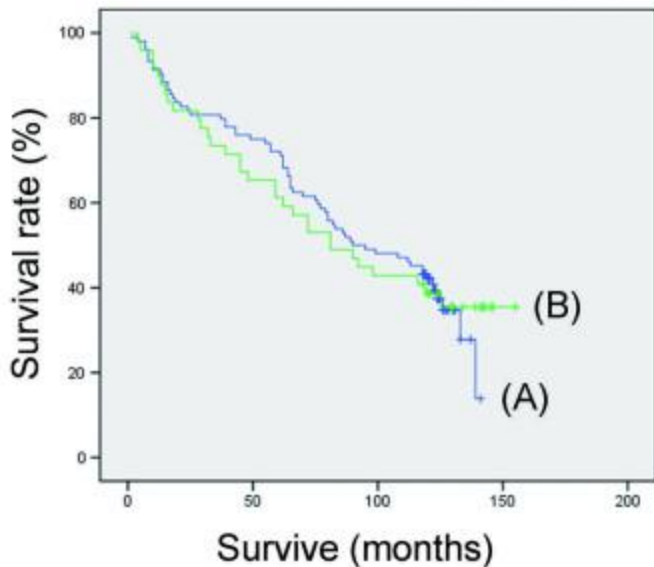

HIWI expression in nuclei

(A) Low expression (n=104)

(B) High expression (n=49)

(A) vs (B)  $P=0.979$   $\chi^2=0.001$

Supplement: MOESM5 [file 9472864]
